# Supplementary material
Source: PubMed Central journal article supplement (PMC5695117)
Supplement: IAI.00690-17_zii012172239s1.pdf [file IAI.00690-17_zii012172239s1.pdf]

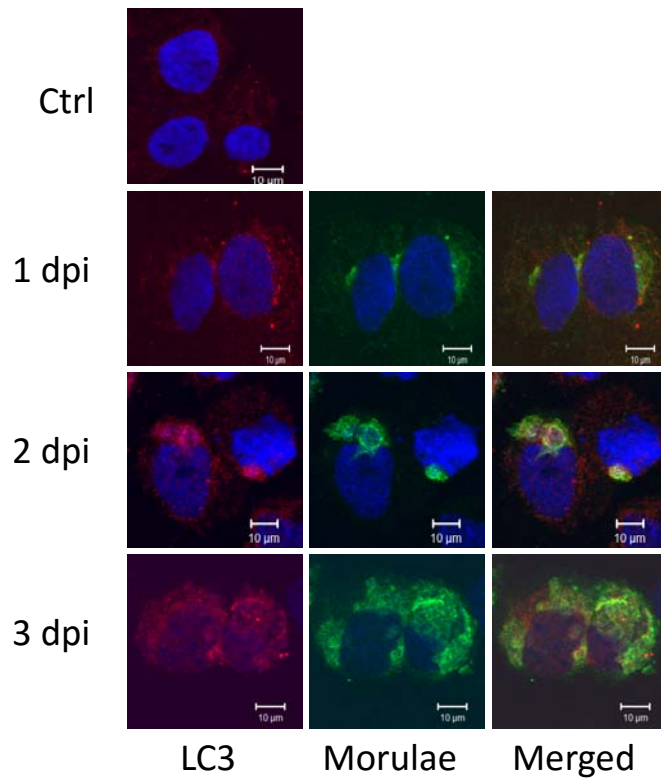

**Fig. S1** *E. chaffeensis* vacuoles colocalize with LC3 in monkey retinal endothelial cells (RF/6A). Uninfected and *E. chaffeensis*-infected RF/6A cells (1, 2 and 3 d.p.i) probed with anti-LC3 (NB100-2220; NovusBio, red; left panels) and polyclonal anti-*E. chaffeensis* antibody (green, center panels) and the merged images (right panels). Cells were visualized by confocal microscopy (40x; Bars, 10 µm). Cell nuclei were stained with DAPI (blue).
